# Supplementary material
Source: Springer Nature journal article supplement (https://www.springermedizin.de/resource/supplementary/12894_2008_120_MOESM2_ESM.pdf/9513964)

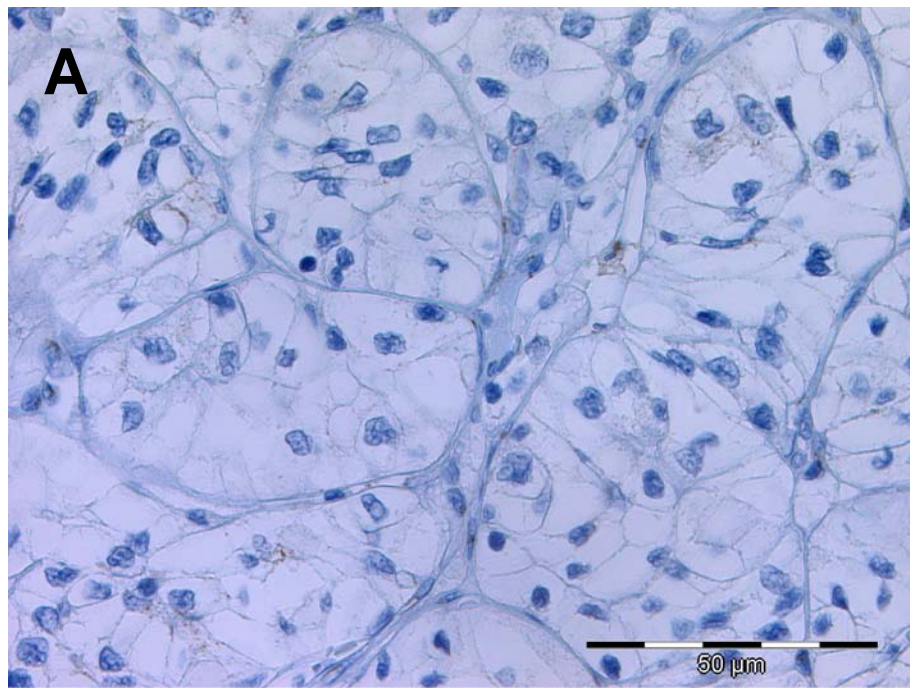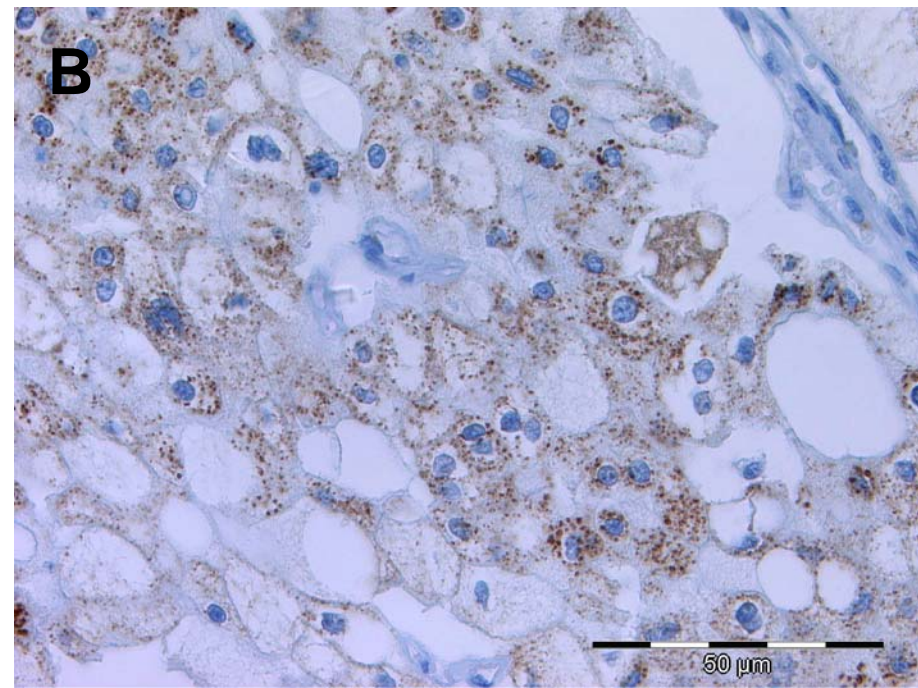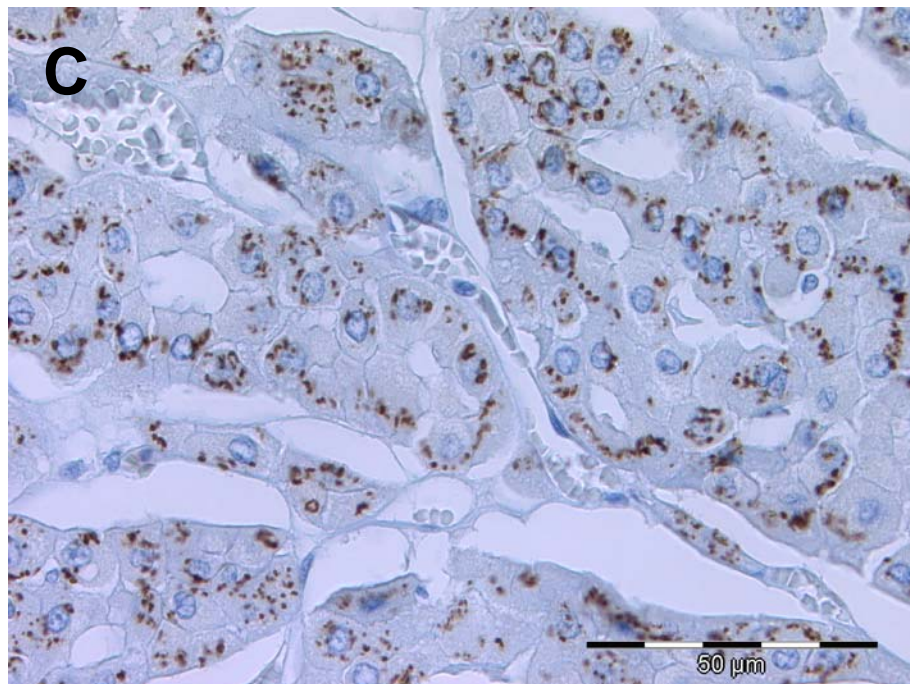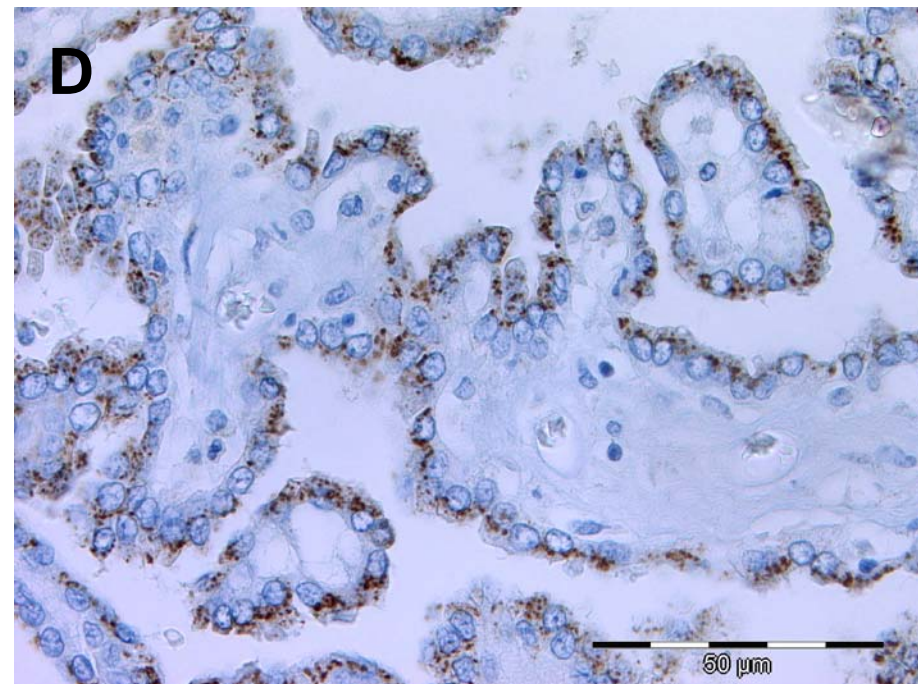

Supplement: MOESM2 [file 9513964]
